# Supplementary material for: Modelling Glacier Evolution in Bhutanese Himalaya during the Little Ice Age
Source: Copernicus journal article supplement (doi:10.5194/tc-2021-352), 2021-12-21
Supplement: Supplementary file 1 [file tc-2021-352-supplement.pdf]

## 2 **Modelling Glacier Evolution in Bhutanese Himalaya during the** 3 **Little Ice Age**

4 Weilin Yang<sup>1</sup>, Yingkui Li<sup>2</sup>, Gengnian. Liu<sup>1</sup>, Wenchao Chu<sup>3</sup>

5 <sup>1</sup>College of Urban and Environmental Sciences, Peking University, Beijing 100871, China.

6 <sup>2</sup>Department of Geography, University of Tennessee, Knoxville, TN 37996, USA.

7 <sup>3</sup>Department of Earth System Science, Ministry of Education Key Laboratory for Earth System Modeling, Institute for Global  
8 Change Studies, Tsinghua University, Beijing 100084, China.

9 *Correspondence to:* Wenchao Chu (peterchuwenchao@foxmail.com)

### 10 **Contents of this file:**

11 Text S1

12 Figures S1 to S5

13 Table S1 to S3

### 14 **Text S1. Moraine age determination**

15 We chose 126 <sup>10</sup>Be surface exposure dating ages across the monsoon-influenced Himalaya for regional LIA chronological  
16 comparison and applied the following criteria to ensure valid comparisons. The results are shown in Table S1.

17 (1) All published <sup>10</sup>Be ages are recalculated using CRONUS Earth V3 online calculator (Balco et al., 2008;  
18 <http://hess.ess.washington.edu/math/>). In the interpretation, we focus on the ages calculated using the time and nuclide-  
19 dependent scaling scheme ‘LSDn’ (Lifton, et al., 2014).

20 (2) A set of <sup>10</sup>Be ages from the same moraine are usually scattered due to nuclide inheritance, such as prior exposure and  
21 incomplete exposure caused by geographic shielding or post weathering processes (Heyman et al., 2011). Therefore,  
22 statistical treatment is of importance to identify potential outliers and to determine the depositional ages of any moraines  
23 (Owen & Dortch, 2014). We applied the Peirce’s criterion to detect outliers (Peirce, 1852; Ross, 2003). Peirce’s criterion  
24 is a rigorous method based on probability theory. An exposure age can be considered as an outlier if the deviation from  
25 the group mean is larger than the maximum allowed deviation. The threshold is determined by multiplying the standard  
26 deviation of all samples and the *R* (the ratio of the maximum allowable value from the data mean to the standard deviation),  
27 using Peirce’s criterion table (Peirce, 1852; Ross, 2003; Peng et al., 2019). The internal uncertainties of all <sup>10</sup>Be ages are  
28 used in Peirce’s criterion. However, it will not identify any outlier if a group of samples are evenly spread out, even if it  
29 is obvious that the ages do not overlap (Yang et al., 2021). Thus, we removed the outliers for these <sup>10</sup>Be ages according  
30 the original published articles and the moraine relative geomorphological positions, morphology and weathering  
31 conditions.

32 (3) After removing outlier(s), the reduced  $\chi^2$  statistic ( $\chi^2_R$ ) was calculated to test if any remaining ages were scattered (Balco,  
 33 2011). If the  $\chi^2_R$  is insignificant at the 95% confidence level ( $p>0.05$ ), the scatter can be explained by measurement errors,  
 34 so the weighted mean was used for moraine age interpretation; if  $\chi^2_R$  is statistically significant ( $P>0.05$ ), the scatter is  
 35 likely caused by prior inheritance or incomplete exposure, thus a range of plausible ages is summarized for the moraine  
 36 (Chen et al., 2015; Li et al., 2016).

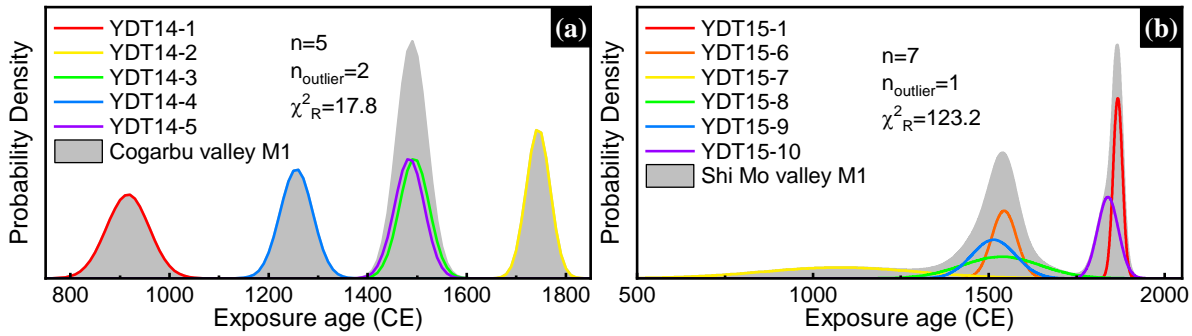

38  
 39 **Figure S1. Probability density plots of  $^{10}\text{Be}$  surface exposure ages with internal uncertainty for moraines (a) Cogarbu valley M1 and**  
 40 **(b) Shi Mo valley M1 in BH, and the reduced  $\chi^2$  statistic ( $\chi^2_R$ ) after removing outliers. The Gauss distribution of each age is plotted**  
 41 **with the mean and standard deviation. The cumulative probability density function (PDF; grey shaded area) is created by summing**  
 42 **probability densities of all ages. These PDFs illustrate the cluster of the ages and potential outliers.**

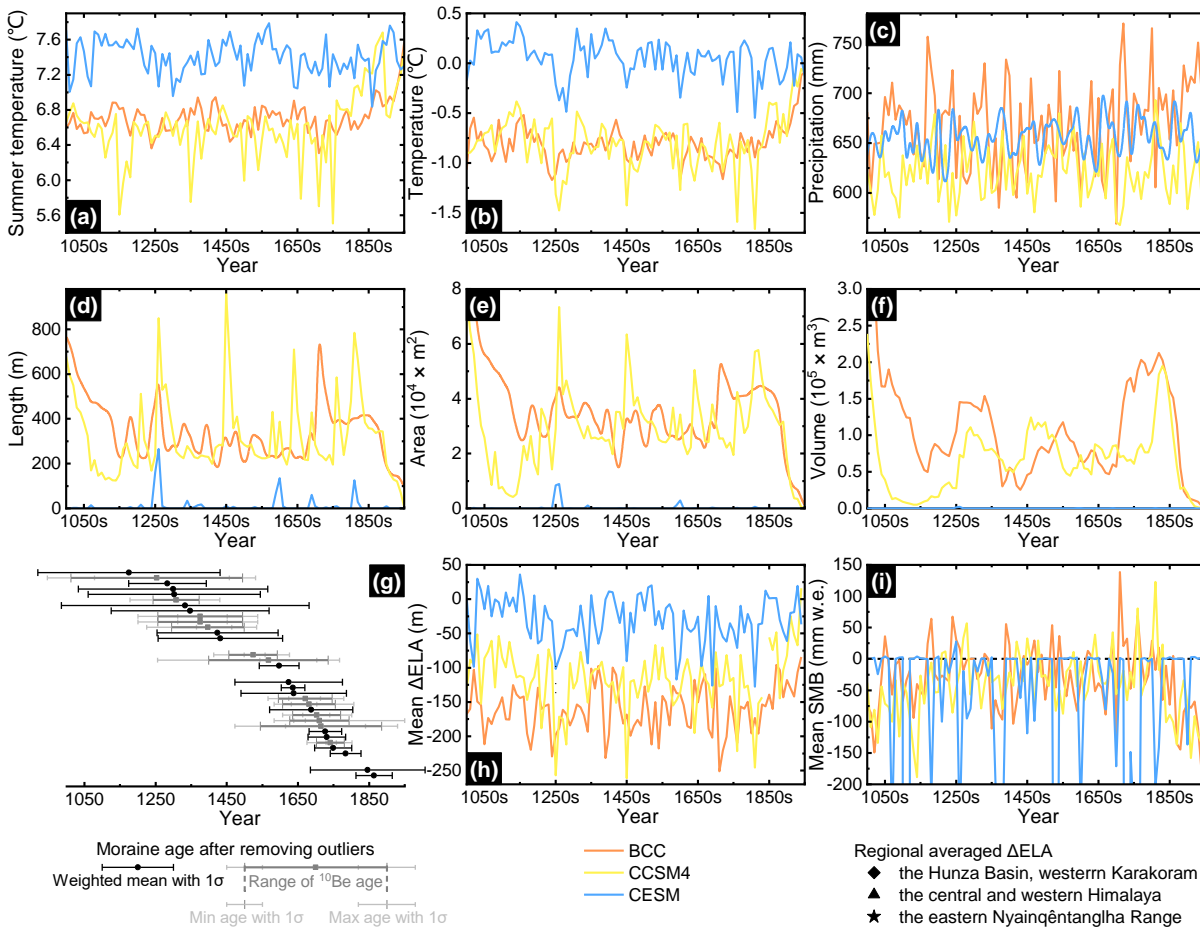

44  
 45 **Figure S2. Interannual (a) summer temperature, (b) temperature, and (c) precipitation changes from 1000s to 1950s averaged over**  
 46 **Bhutanese Himalaya. Glacier (d) length, (e) area, (f) volume, (h) ELA, and (i) SMB changes during LIA across the studied area,**

47 modelled by OGGM using three separate GCM produces (BCC, CCSM4, and CESM). Each glacier in the OGGM runs has its length,  
 48 area, volume, and ELA changes normalized relative to the corresponding averaged parameters during 1950s in the run output.  
 49 Besides, the recalculated moraine ages across the monsoon-influenced Himalaya are also shown (g). The regional averaged  $\Delta$ ELAs  
 50 are illustrated in Figure 2h.  
 51

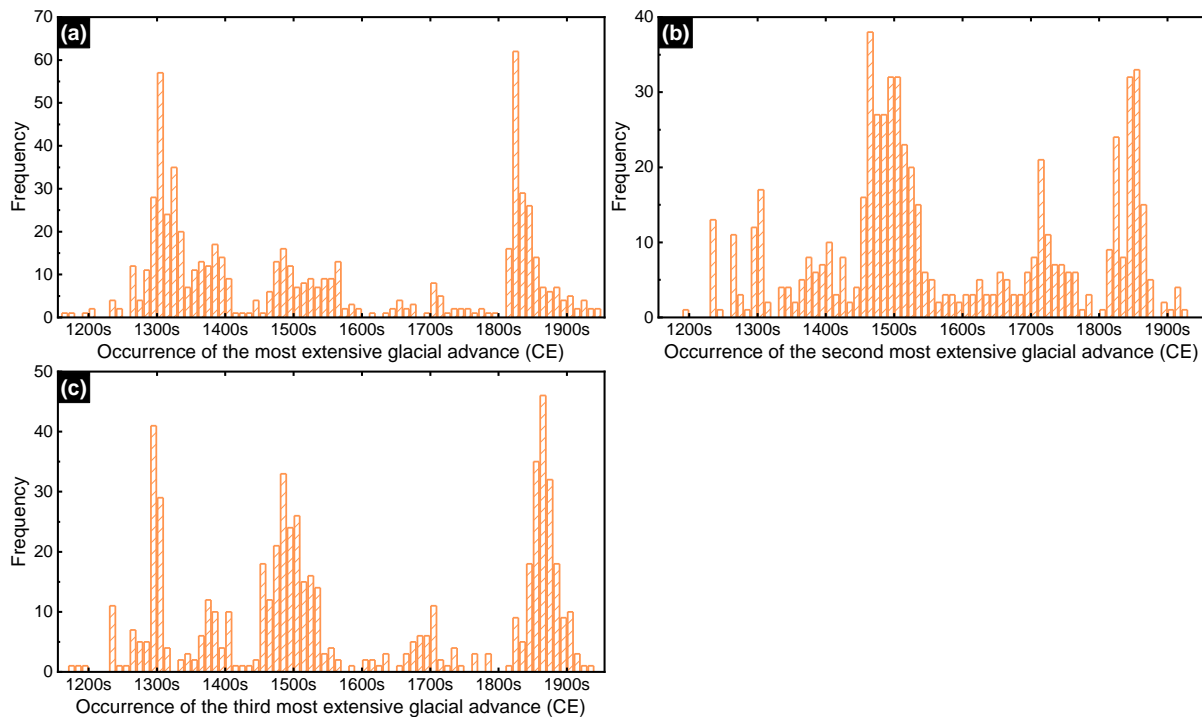

52  
 53 **Figure S3.** The frequency distribution chart shows the occurrence of the most (a), second most (b), and third most (c) extensive  
 54 glacial advance of each glacier for the GISS experiment.  
 55

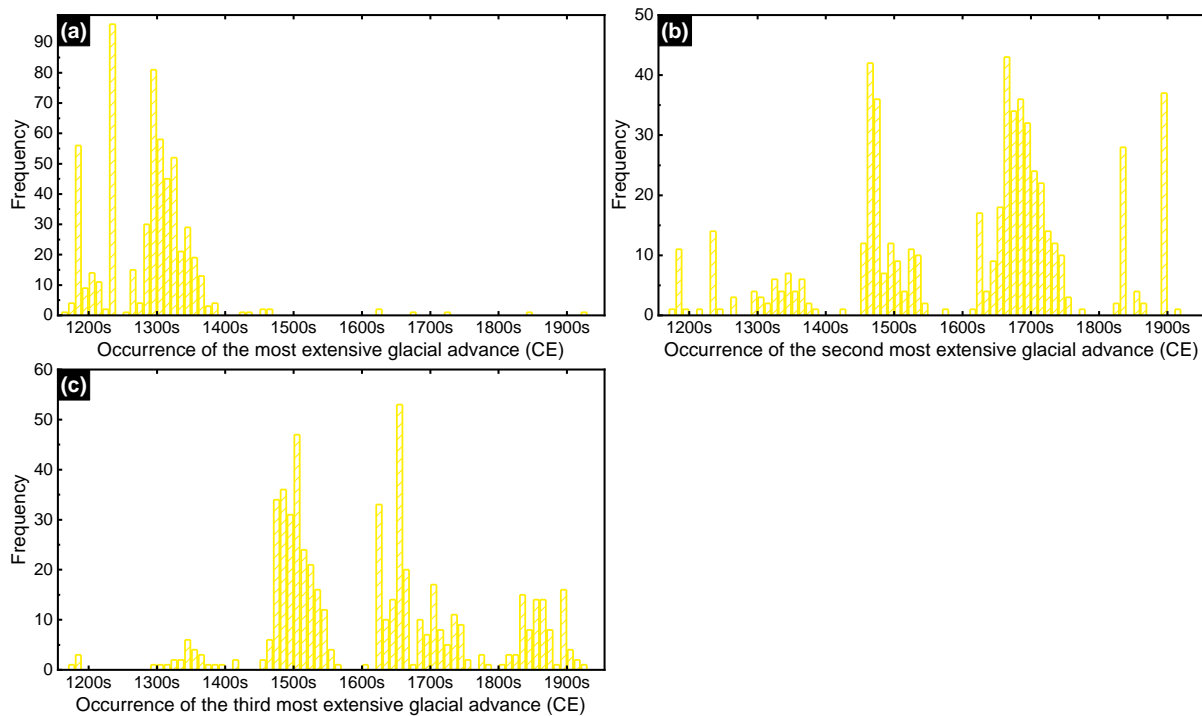

56  
 57 **Figure S4.** The frequency distribution chart shows the occurrence of the most (a), second most (b), and third most (c) extensive  
 58 glacial advance of each glacier for the IPSL experiment.  
 59

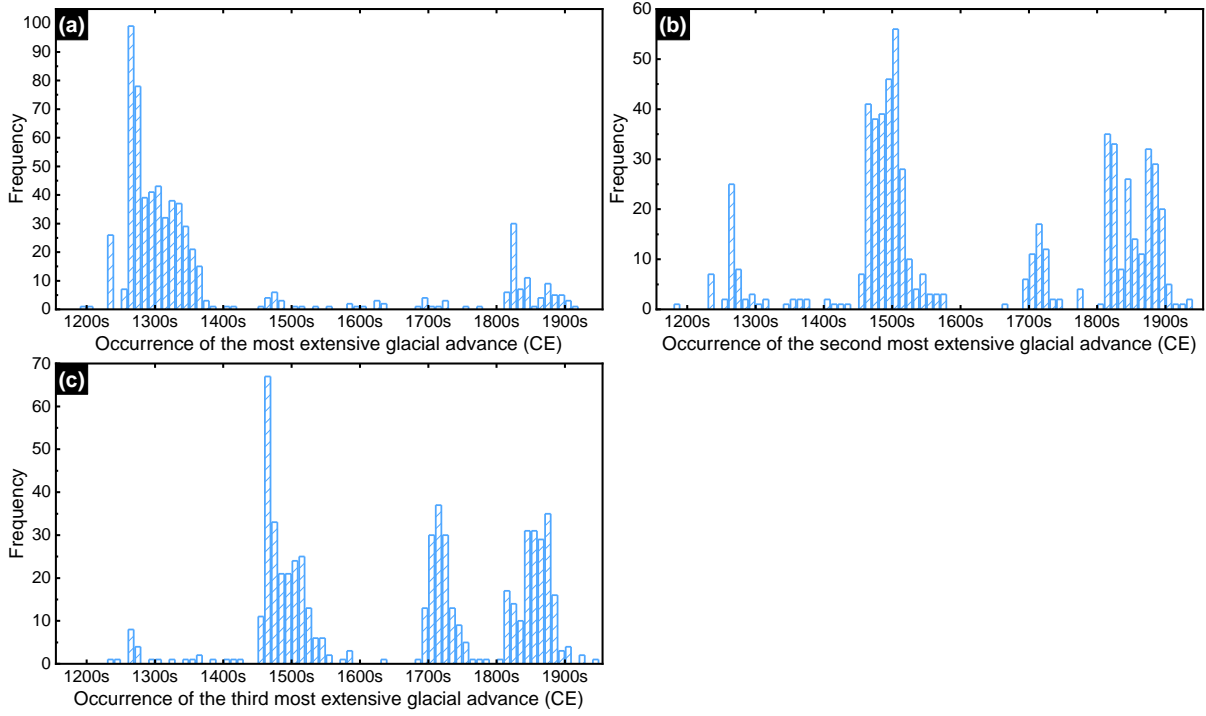

60

61

62

**Figure S5. The frequency distribution chart shows the occurrence of the most (a), second most (b), and third most (c) extensive glacial advance of each glacier for the MPI experiment.**

**Table S1. Recalculated previously published minimum  $^{10}\text{Be}$  surface exposure ages in the monsoon-influenced Hiamlaya using the CRONUS Earth V3 online calculator with the time-dependent scaling scheme “LSDn”.**

| Location and Source                    | Moraine                          | Sample ID                  | Latitude (°) | Longitude (°) | Elevation (m) | Thickness (cm) | Topographic shielding factor | $^{10}\text{Be}$ Concentration (atoms/g) | Recalculated $^{10}\text{Be}$ age (ka) | Moraine age (CE)       |
|----------------------------------------|----------------------------------|----------------------------|--------------|---------------|---------------|----------------|------------------------------|------------------------------------------|----------------------------------------|------------------------|
| Bhutanese Himalaya; Peng et al. (2019) | M1, Cogarbu valley               | YDT14-1 <sup>(1)</sup>     | 28.2386      | 89.8913       | 4955          | 5              | 0.9735                       | 58500 ± 2300                             | 1098 ± 78                              | 1256 ± 56 - 1494 ± 43  |
|                                        |                                  | YDT14-2 <sup>(1)</sup>     | 28.2383      | 89.8915       | 4946          | 5              | 0.9743                       | 12300 ± 1100                             | 270 ± 29                               |                        |
|                                        |                                  | YDT14-3                    | 28.239       | 89.8911       | 4947          | 5              | 0.9735                       | 24200 ± 1400                             | 520 ± 43                               |                        |
|                                        |                                  | YDT14-4                    | 28.2397      | 89.8906       | 4945          | 4              | 0.9657                       | 36300 ± 1600                             | 758 ± 56                               |                        |
|                                        |                                  | YDT14-5                    | 28.2401      | 89.8904       | 4942          | 5              | 0.9657                       | 24500 ± 1400                             | 530 ± 44                               |                        |
| Bhutanese Himalaya; Peng et al. (2020) | M1, Shimo valley                 | YDT15-1                    | 28.2851      | 89.99504      | 5064          | 3              | 0.99                         | 7387 ± 607                               | 147 ± 15                               | 1077 ± 228 - 1867 ± 15 |
|                                        |                                  | YDT15-4 <sup>(1)</sup>     | 28.2852      | 89.9949       | 5072          | 3              | 0.99                         | 144194 ± 3240                            | 2614 ± 165                             |                        |
|                                        |                                  | YDT15-6                    | 28.2838      | 89.9938       | 5103          | 4              | 0.92                         | 22257 ± 1646                             | 470 ± 44                               |                        |
|                                        |                                  | YDT15-7                    | 28.2837      | 89.99367      | 5104          | 5              | 0.92                         | 47302 ± 11166                            | 937 ± 228                              |                        |
|                                        |                                  | YDT15-8                    | 28.2837      | 89.99375      | 5103          | 5              | 0.92                         | 22466 ± 5240                             | 478 ± 115                              |                        |
|                                        |                                  | YDT15-9                    | 28.2837      | 89.99385      | 5100          | 5              | 0.97                         | 24796 ± 3072                             | 500 ± 69                               |                        |
|                                        |                                  | YDT15-10                   | 28.2833      | 89.99351      | 5107          | 4              | 0.98                         | 8768 ± 1443                              | 175 ± 31                               |                        |
| Lahul Himalaya; Saha et al. (2018)     | m <sub>H1a</sub> , Hamtah valley | HAMTAH-1405                | 32.2725      | 77.35738      | 4014          | 2              | 0.9429                       | 8900 ± 1900                              | 281 ± 62                               | 1200 ± 93 - 1837 ± 32  |
|                                        |                                  | HAMTAH-1406                | 32.2722      | 77.3575       | 4023          | 1              | 0.9444                       | 15600 ± 4100                             | 463 ± 125                              |                        |
|                                        |                                  | HAMTAH-1408 <sup>(1)</sup> | 32.2686      | 77.35847      | 4111          | 2.5            | 0.9540                       | 90600 ± 5500                             | 2209 ± 187                             |                        |
|                                        |                                  | HAMTAH-1410                | 32.2678      | 77.35892      | 4125          | 2.5            | 0.9476                       | 6000 ± 1000                              | 179 ± 32                               |                        |
|                                        |                                  | HAMTAH-1502                | 32.2954      | 77.36555      | 3861.182      | 2              | 0.9233                       | 25700 ± 2500                             | 816 ± 93                               |                        |
|                                        | m <sub>A1</sub> , Lato valley    | LATO-1415 <sup>(2)</sup>   | 33.6822      | 77.59202      | 5366          | 3              | 0.9501                       | 133100 ± 3100                            | 1603 ± 102                             | 1595 ± 29 - 1746 ± 33  |
|                                        |                                  | LATO-1416                  | 33.6822      | 77.5921       | 5358          | 4              | 0.9501                       | 16600 ± 1800                             | 270 ± 33                               |                        |
|                                        |                                  | LATO-1417                  | 33.6826      | 77.59203      | 5348          | 2              | 0.9508                       | 27400 ± 1000                             | 421 ± 29                               |                        |
|                                        |                                  | LATO-1418                  | 33.6826      | 77.59207      | 5351          | 3              | 0.9459                       | 17900 ± 1400                             | 290 ± 28                               |                        |
|                                        |                                  | LATO-1419 <sup>(2)</sup>   | 33.6827      | 77.592        | 5339          | 3              | 0.9517                       | 246600 ± 18500                           | 3162 ± 302                             |                        |
|                                        | m <sub>A2c</sub> , Lato valley   | LATO-1409 <sup>(2)</sup>   | 33.6851      | 77.59525      | 5314          | 3              | 0.9593                       | 2651000 ± 56400                          | 26351 ± 1664                           | 1456 ± 43 - 1592 ± 34  |
|                                        |                                  | LATO-1410 <sup>(2)</sup>   | 33.6851      | 77.59531      | 5321          | 2.5            | 0.9593                       | 218600 ± 8700                            | 2862 ± 204                             |                        |
|                                        |                                  | LATO-1411 <sup>(2)</sup>   | 33.6851      | 77.5952       | 5315          | 2              | 0.9593                       | 296300 ± 17800                           | 3861 ± 325                             |                        |
|                                        |                                  | LATO-1412                  | 33.685       | 77.59566      | 5315          | 1              | 0.9576                       | 27600 ± 1500                             | 424 ± 34                               |                        |
|                                        |                                  | LATO-1413 <sup>(1)</sup>   | 33.6849      | 77.59573      | 5317          | 2              | 0.9594                       | 57700 ± 2000                             | 828 ± 57                               |                        |
| m <sub>M1</sub> , Karzok valley        | LATO-1414                        | 33.6851                    | 77.59538     | 5314          | 2             | 0.9596         | 37600 ± 1800                 | 560 ± 43                                 | 1283 ± 109                             |                        |
|                                        | KO-7 <sup>(1)</sup>              | 32.933                     | 78.214       | 5524          | 6             | 1              | 20400 ± 1400                 | 306 ± 28                                 |                                        |                        |
|                                        | KO-8                             | 32.933                     | 78.214       | 5516          | 2.5           | 1              | 59200 ± 5500                 | 782 ± 86                                 |                                        |                        |
|                                        | KO-9                             | 32.934                     | 78.215       | 5503          | 1             | 1              | 60000 ± 2400                 | 786 ± 56                                 |                                        |                        |
|                                        | KO10                             | 32.934                     | 78.215       | 5503          | 1             | 1              | 47300 ± 6700                 | 630 ± 97                                 |                                        |                        |

|                                              |                                                                                                                                                                                                                                                                 |                                                           |                         |                      |         |            |         |                    |                 |                           |            |           |
|----------------------------------------------|-----------------------------------------------------------------------------------------------------------------------------------------------------------------------------------------------------------------------------------------------------------------|-----------------------------------------------------------|-------------------------|----------------------|---------|------------|---------|--------------------|-----------------|---------------------------|------------|-----------|
| Annapurna;<br>Zech et al.<br>(2009)          | Dudh Khola<br>Valley                                                                                                                                                                                                                                            | DK11                                                      | 28.627                  | 84.467               | 3650    | 2          | 0.942   | 3950 ± 3910        | 162 ± 161       | 1846 ± 161                |            |           |
| Lhagoi Kangri<br>Range;<br>Liu et al. (2017) | M1A, Karola<br>Pass                                                                                                                                                                                                                                             | TB-14-33                                                  | 28.9502                 | 90.1346              | 4988    | 3          | 0.937   | 6960 ± 3350        | 150 ± 73        | 1864 ± 51                 |            |           |
|                                              |                                                                                                                                                                                                                                                                 | TB-14-34                                                  | 28.9498                 | 90.1344              | 4996    | 5          | 0.94    | 6760 ± 810         | 147 ± 20        |                           |            |           |
|                                              |                                                                                                                                                                                                                                                                 | TB-14-36 <sup>(1)</sup>                                   | 28.9492                 | 90.1342              | 5012    | 3          | 0.936   | 12390 ± 680        | 267 ± 22        | 1702 ± 27 - 1780 ±<br>22  |            |           |
|                                              |                                                                                                                                                                                                                                                                 | TB-14-39                                                  | 28.9493                 | 90.1338              | 5017    | 6          | 0.944   | 14270 ± 870        | 312 ± 27        |                           |            |           |
|                                              |                                                                                                                                                                                                                                                                 | TB-14-41                                                  | 28.9508                 | 90.134               | 4980    | 3          | 0.952   | 10900 ± 800        | 234 ± 22        |                           |            |           |
| Nepal Himalaya;<br>Barnard et al.<br>(2006)  | inner moraine,<br>Langtang<br>Khola Valley<br>outer moraine,<br>Langtang<br>Khola Valley                                                                                                                                                                        | TB-14-42 <sup>(1)</sup>                                   | 28.9506                 | 90.134               | 4980    | 6          | 0.958   | 19250 ± 4540       | 416 ± 101       | 1302 ± 242                |            |           |
|                                              |                                                                                                                                                                                                                                                                 | KTM4                                                      | 28.21                   | 85.56                | 3924    | 5          | 0.97    | 25000 ± 8000       | 741 ± 241       |                           |            |           |
|                                              |                                                                                                                                                                                                                                                                 | KTM5 <sup>(1)</sup>                                       | 28.21                   | 85.56                | 3922    | 5          | 0.97    | 44000 ± 12000      | 1166 ± 325      | 1175 ± 256                |            |           |
|                                              |                                                                                                                                                                                                                                                                 | KTM6                                                      | 28.21                   | 85.56                | 3923    | 5          | 0.97    | 22000 ± 8000       | 658 ± 242       |                           |            |           |
|                                              |                                                                                                                                                                                                                                                                 | KTM7                                                      | 28.21                   | 85.57                | 3840    | 5          | 0.98    | 27000 ± 9000       | 817 ± 277       |                           |            |           |
|                                              |                                                                                                                                                                                                                                                                 | KTM8                                                      | 28.21                   | 85.57                | 3838    | 5          | 0.98    | 28000 ± 8000       | 845 ± 246       |                           |            |           |
|                                              |                                                                                                                                                                                                                                                                 | KTM9 <sup>(1)</sup>                                       | 28.21                   | 85.57                | 3839    | 5          | 0.98    | 33000 ± 10000      | 965 ± 298       |                           |            |           |
|                                              |                                                                                                                                                                                                                                                                 | KAL7                                                      | 30.7898                 | 78.9522              | 3635    | 3          | 0.911   | 6800 ± 1200        | 282 ± 53        |                           | 1731 ± 53  |           |
| KAL9 <sup>(1)</sup>                          | 30.7897                                                                                                                                                                                                                                                         | 78.9523                                                   | 3637                    | 3                    | 0.911   | 1700 ± 300 | 69 ± 13 |                    |                 |                           |            |           |
| Garhwal;<br>Murari et al.<br>(2014)          | Dudhganga<br>valleys<br>m <sub>bd3</sub> ,<br>Bhillangana<br>and<br>Dudhganga<br>valleys<br>m <sub>bd2</sub> ,<br>Bhillangana<br>and<br>Dudhganga<br>valleys<br>m <sub>bd1</sub> ,<br>Bhillangana<br>and<br>Dudhganga<br>valleys<br>m <sub>k2</sub> , Kedarnath | KAL10                                                     | 30.7839                 | 78.9511              | 3579    | 3          | 0.937   | 6200 ± 1200        | 258 ± 52        | 1607 ± 24 - 1755 ±<br>52  |            |           |
|                                              |                                                                                                                                                                                                                                                                 | KAL11                                                     | 30.7838                 | 78.9509              | 3576    | 2.5        | 0.937   | 7000 ± 900         | 291 ± 41        |                           |            |           |
|                                              |                                                                                                                                                                                                                                                                 | KAL12 <sup>(2)</sup>                                      | 30.7836                 | 78.9507              | 3568    | 2          | 0.937   | 47300 ± 2500       | 1596 ± 126      | 1597 ± 56                 |            |           |
|                                              |                                                                                                                                                                                                                                                                 | KAL13 <sup>(2)</sup>                                      | 30.7834                 | 78.9504              | 3571    | 3          | 0.943   | 69300 ± 3200       | 2510 ± 188      |                           |            |           |
|                                              |                                                                                                                                                                                                                                                                 | KAL14                                                     | 30.7831                 | 78.9501              | 3571    | 2.5        | 0.938   | 10000 ± 100        | 406 ± 24        |                           |            |           |
|                                              |                                                                                                                                                                                                                                                                 | KAL1                                                      | 30.7778                 | 78.9515              | 3641    | 1.5        | 0.937   | 9900 ± 800         | 386 ± 39        |                           |            |           |
|                                              |                                                                                                                                                                                                                                                                 | KAL2                                                      | 30.7777                 | 78.9512              | 3650    | 2          | 0.923   | 11400 ± 1200       | 445 ± 54        |                           |            |           |
|                                              |                                                                                                                                                                                                                                                                 | KAL3 <sup>(2)</sup>                                       | 30.7782                 | 78.9506              | 3646    | 1.5        | 0.935   | 2500 ± 300         | 98 ± 13         |                           |            |           |
|                                              |                                                                                                                                                                                                                                                                 | KAL4 <sup>(2)</sup>                                       | 30.7782                 | 78.9504              | 3657    | 1.5        | 0.923   | 500 ± 200          | 19 ± 8          |                           |            |           |
|                                              |                                                                                                                                                                                                                                                                 | KAL5 <sup>(2)</sup>                                       | 30.7782                 | 78.9533              | 3644    | 5          | 0.929   | 2300 ± 300         | 94 ± 13         |                           |            |           |
|                                              |                                                                                                                                                                                                                                                                 | KAL18                                                     | 30.7565                 | 78.9629              | 4132    | 2          | 0.949   | 8600 ± 1200        | 263 ± 40        |                           | 1727 ± 46  |           |
|                                              |                                                                                                                                                                                                                                                                 | KAL19                                                     | 30.7585                 | 78.9627              | 4182    | 2          | 0.937   | 10700 ± 800        | 322 ± 31        |                           |            |           |
|                                              |                                                                                                                                                                                                                                                                 | KAL20 <sup>(2)</sup>                                      | 30.7567                 | 78.9628              | 4115    | 2          | 0.94    | 36400 ± 3000       | 999 ± 101       | 1399 ± 144 - 1735<br>± 32 |            |           |
|                                              |                                                                                                                                                                                                                                                                 | KAL21                                                     | 30.7567                 | 78.9653              | 4108    | 2          | 0.939   | 8700 ± 1200        | 272 ± 41        |                           |            |           |
|                                              |                                                                                                                                                                                                                                                                 | KAL35                                                     | 30.7448                 | 79.6503              | 3841    | 4          | 0.953   | 18100 ± 4100       | 614 ± 144       |                           |            |           |
|                                              |                                                                                                                                                                                                                                                                 | KAL36                                                     | 30.7454                 | 79.0652              | 3853    | 5          | 0.95    | 8000 ± 900         | 289 ± 37        |                           |            |           |
|                                              |                                                                                                                                                                                                                                                                 | KAL37                                                     | 30.7462                 | 79.0655              | 3884    | 3          | 0.959   | 722000 ±<br>222000 | 17750 ±<br>5582 |                           |            |           |
|                                              |                                                                                                                                                                                                                                                                 | central Gangdise<br>Mountains;<br>Zhang et al.<br>(2018a) | M2, Lopu<br>Kangri Area | KAL38                | 30.7473 | 79.0661    | 3909    | 5                  | 0.959           | 8000 ± 800                | 278 ± 32   | 1749 ± 52 |
|                                              |                                                                                                                                                                                                                                                                 |                                                           |                         | KAL39 <sup>(2)</sup> | 30.7478 | 79.0662    | 3915    | 2.5                | 0.096           | 12200 ± 2200              | 3286 ± 624 |           |
|                                              |                                                                                                                                                                                                                                                                 |                                                           |                         | 13GDS5-1             | 29.8182 | 84.6951    | 5499    | 2.3                | 0.9987          | 16841 ± 5336              | 272 ± 88   | 1636 ± 33 |
|                                              |                                                                                                                                                                                                                                                                 |                                                           |                         | 13GDS5-2             | 29.8183 | 84.69497   | 5502    | 2.3                | 0.9987          | 15443 ± 1656              | 249 ± 30   |           |
| 13GDS5-3                                     | 29.8184                                                                                                                                                                                                                                                         |                                                           |                         | 84.69493             | 5499    | 1.6        | 0.9987  | 15852 ± 1738       | 254 ± 32        |                           |            |           |
| 13GDS5-4                                     | 29.8184                                                                                                                                                                                                                                                         |                                                           |                         | 84.69494             | 5499    | 2.3        | 0.9987  | 16802 ± 2471       | 271 ± 43        |                           |            |           |
| 13GDS5-5                                     | 29.8184                                                                                                                                                                                                                                                         |                                                           |                         | 84.69492             | 5499    | 2.1        | 0.9987  | 17103 ± 2123       | 276 ± 38        |                           |            |           |
| 14GDS1-1 <sup>(1)</sup>                      | 29.8199                                                                                                                                                                                                                                                         |                                                           |                         | 84.69476             | 5487    | 2.7        | 0.9991  | 24815 ± 1263       | 396 ± 31        |                           |            |           |

|                                          |                                                 |                         |         |          |      |     |        |                |            |                        |
|------------------------------------------|-------------------------------------------------|-------------------------|---------|----------|------|-----|--------|----------------|------------|------------------------|
|                                          | M3, Lopu Kangri Area                            | 14GDS1-2                | 29.8197 | 84.69494 | 5487 | 1.8 | 0.9991 | 24372 ± 1496   | 387 ± 33   |                        |
|                                          |                                                 | 14GDS1-3 <sup>(1)</sup> | 29.8197 | 84.69493 | 5490 | 2.1 | 0.9991 | 22040 ± 1462   | 353 ± 31   |                        |
|                                          |                                                 | 14GDS1-4                | 29.8197 | 84.69496 | 5489 | 2.3 | 0.9991 | 23087 ± 1329   | 369 ± 30   |                        |
|                                          | M4, Lopu Kangri Area                            | 13GDS6-1                | 29.8185 | 84.69688 | 5497 | 2.2 | 0.9992 | 17083 ± 5786   | 276 ± 95   | 1638 ± 148             |
|                                          |                                                 | 13GDS6-2                | 29.8185 | 84.69686 | 5495 | 2.3 | 0.9992 | 29569 ± 9646   | 464 ± 154  |                        |
|                                          |                                                 | 13GDS6-3 <sup>(1)</sup> | 29.8185 | 84.69686 | 5495 | 2   | 0.9992 | 83279 ± 11788  | 1109 ± 170 |                        |
|                                          |                                                 | 13GDS6-4                | 29.8186 | 84.6968  | 5495 | 2   | 0.9992 | 24311 ± 7756   | 386 ± 125  |                        |
|                                          | M5, Lopu Kangri Area                            | 13GDS7-1                | 29.8191 | 84.69875 | 5507 | 1.9 | 0.9995 | 24986 ± 6518   | 393 ± 105  | 1687 ± 117             |
|                                          |                                                 | 13GDS7-2                | 29.8195 | 84.69881 | 5504 | 2.1 | 0.9996 | 15735 ± 7287   | 253 ± 118  |                        |
|                                          |                                                 | 13GDS7-3                | 29.8195 | 84.69893 | 5507 | 1.6 | 0.9996 | 18660 ± 7520   | 298 ± 121  |                        |
|                                          |                                                 | 13GDS7-4                | 29.8195 | 84.69896 | 5508 | 2   | 0.9996 | 22186 ± 5085   | 352 ± 83   |                        |
|                                          |                                                 | 13GDS7-5 <sup>(1)</sup> | 29.8196 | 84.69889 | 5508 | 2   | 0.9996 | 44702 ± 9611   | 677 ± 151  |                        |
| Himalaya; Owen et al. (2009)             | T7, Mount Everest                               | Ron-51                  | 28.13   | 86.853   | 5216 | 4   | 0.97   | 11000 ± 8000   | 214 ± 156  | 1627 ± 44 - 1794 ± 156 |
|                                          |                                                 | Ron-53                  | 28.129  | 86.854   | 5213 | 2   | 0.97   | 20000 ± 2000   | 381 ± 44   |                        |
|                                          |                                                 | Ron-55 <sup>(1)</sup>   | 28.13   | 86.856   | 5225 | 2   | 0.97   | 39000 ± 3000   | 716 ± 69   |                        |
| Gurla Mandhata; Owen et al. (2010)       | M10, Muguru Valley                              | Na48                    | 30.463  | 81.217   | 5508 | 2   | 0.946  | 29000 ± 4100   | 465 ± 71   | 1544 ± 71 - 1885 ± 45  |
|                                          |                                                 | Na49 <sup>(2)</sup>     | 30.463  | 81.217   | 5506 | 1   | 0.946  | 229900 ± 6500  | 3178 ± 208 |                        |
|                                          |                                                 | Na50                    | 30.463  | 81.217   | 5509 | 2   | 0.946  | 7500 ± 2700    | 124 ± 45   |                        |
|                                          |                                                 | Na52 <sup>(2)</sup>     | 30.464  | 81.217   | 5514 | 2   | 0.952  | 280900 ± 6900  | 3932 ± 252 |                        |
|                                          |                                                 | Na53                    | 30.464  | 81.216   | 5509 | 2   | 0.955  | 17800 ± 1200   | 294 ± 26   |                        |
| West Himalaya; Dortch et al. (2013)      | Pangong Cirque, Ladakh, Nn India                | Pang-24 <sup>(1)</sup>  | 33.888  | 78.425   | 5375 | 5   | 1      | 14824 ± 6621   | 229 ± 103  | 1347 ± 222             |
|                                          |                                                 | Pang-25 <sup>(1)</sup>  | 33.888  | 78.425   | 5375 | 5   | 1      | 162492 ± 37623 | 1885 ± 451 |                        |
|                                          |                                                 | Pang-26                 | 33.888  | 78.425   | 5368 | 5   | 1      | 49909 ± 8581   | 698 ± 127  |                        |
|                                          |                                                 | Pang-27                 | 33.888  | 78.425   | 5371 | 5   | 1      | 57723 ± 19329  | 793 ± 270  |                        |
|                                          |                                                 | Pang-28 <sup>(1)</sup>  | 33.888  | 78.426   | 5363 | 5   | 1      | 163049 ± 23407 | 1902 ± 295 |                        |
|                                          |                                                 | Pang-29                 | 33.888  | 78.426   | 5360 | 4   | 1      | 35547 ± 9858   | 509 ± 144  |                        |
| Northwestern India; Lee et al. (2014)    | TG3, Nun-Kun massif                             | NK29                    | 34.06   | 75.92    | 3679 | 2.5 | 0.96   | 15631 ± 513.7  | 513 ± 35   | 1295 ± 70 - 1499 ± 35  |
|                                          |                                                 | NK-30                   | 34.05   | 75.92    | 3720 | 4   | 0.96   | 22600 ± 1764.7 | 717 ± 70   |                        |
| Garhwal; Scherler et al. (2010)          | Jaundhar Glacier, Tons Valley                   | DS6-057                 | 31.142  | 78.454   | 3636 | 3   | 0.95   | 13695 ± 538    | 515 ± 37   | 1012 ± 66 - 1494 ± 37  |
|                                          |                                                 | DS6-058                 | 31.142  | 78.453   | 3623 | 3   | 0.94   | 28171 ± 821    | 997 ± 66   |                        |
|                                          | Bandarpunch Glacier                             | DS6-032                 | 31.072  | 78.499   | 4071 | 3   | 0.95   | 12086 ± 551    | 374 ± 28   | 1635 ± 28 - 1770 ± 31  |
|                                          |                                                 | DS6-033                 | 31.072  | 78.498   | 4046 | 2   | 0.97   | 7688 ± 873     | 239 ± 31   |                        |
| Garhwal Himalaya; Barnard et al. (2004a) | m4, Gori Ganga Valley                           | NDL2                    | 30.45   | 80.12    | 3534 | 5   | 0.97   | 14000 ± 5000   | 492 ± 178  | 1299 ± 266             |
|                                          |                                                 | NDL4                    | 30.45   | 80.12    | 3522 | 5   | 0.96   | 27000 ± 4000   | 915 ± 146  |                        |
|                                          | M3, Gori Ganga Valley                           | NDL9                    | 30.45   | 80.13    | 3505 | 5   | 0.97   | 7000 ± 5000    | 261 ± 187  | 1624 ± 151             |
|                                          |                                                 | NDL10                   | 30.45   | 80.13    | 3510 | 5   | 0.98   | 13000 ± 2000   | 461 ± 76   |                        |
| Garhwal Himalaya; Barnard et al. (2004b) | Gangotri glacial stage, Upper Bhagirathi Valley | BH29                    | 30.945  | 79.061   | 3973 | 5   | 0.97   | 31241 ± 8369   | 821 ± 225  | 1333 ± 348             |
|                                          |                                                 | BH30                    | 30.945  | 79.062   | 3956 | 5   | 0.97   | 15261 ± 6683   | 427 ± 189  |                        |
|                                          |                                                 | BH31                    | 30.945  | 79.062   | 3973 | 5   | 0.97   | 11177 ± 6842   | 319 ± 196  |                        |
|                                          |                                                 | BH32                    | 30.945  | 79.062   | 3956 | 5   | 0.97   | 43712 ± 7013   | 1065 ± 182 |                        |
| Annapurna Range;                         | E moraine crest,                                | NP222 <sup>(1)</sup>    | 28.635  | 84.042   | 4000 | 2   | 0.91   | 43480 ± 6510   | 1141 ± 184 | 1424 ± 170             |
|                                          |                                                 | NP223                   | 28.635  | 84.042   | 3813 | 2   | 0.912  | 23060 ± 3620   | 743 ± 125  |                        |

|                                    |                                    |                        |         |         |      |       |             |              |           |                       |
|------------------------------------|------------------------------------|------------------------|---------|---------|------|-------|-------------|--------------|-----------|-----------------------|
| Heimsath & McGlynn (2008)          | Milarepa's Glacier                 | NP233                  | 28.635  | 84.042  | 4275 | 2     | 0.907       | 15090 ± 3380 | 401 ± 93  | 1243 ± 65 - 1372 ± 58 |
|                                    |                                    | NP234                  | 28.635  | 84.042  | 4216 | 2     | 1           | 24830 ± 1990 | 601 ± 60  |                       |
|                                    |                                    | NP235 <sup>(1)</sup>   | 28.635  | 84.042  | 4157 | 2     | 0.91        | 43480 ± 6510 | 210 ± 22  |                       |
|                                    | W moraine crest,                   | NP212                  | 28.641  | 84.044  | 3844 | 2     | 1           | 26460 ± 1620 | 763 ± 65  |                       |
| NP213 <sup>(1)</sup>               |                                    | 28.641                 | 84.044  | 3797    | 2    | 0.935 | 7042 ± 1780 | 234 ± 61     |           |                       |
| Nun Kun massif; Saha et al. (2019) | M <sub>p1</sub> , Parkachik valley | NP214                  | 28.641  | 84.044  | 3669 | 2     | 1           | 19810 ± 1400 | 634 ± 58  | 1784 ± 43             |
|                                    |                                    | PAR1601                | 34.0835 | 75.9998 | 3700 | 2     | 0.968       | 5600 ± 600   | 192 ± 23  |                       |
|                                    |                                    | PAR1602 <sup>(1)</sup> | 34.0844 | 76.0001 | 3687 | 3     | 0.973       | 3300 ± 800   | 114 ± 28  |                       |
|                                    |                                    | PAR1603                | 34.0846 | 76.0002 | 3678 | 3.5   | 0.974       | 7100 ± 500   | 247 ± 23  |                       |
| Lahul massif; Saha et al. (2019)   | M <sub>k2</sub> , Kulti valley     | PAR1606                | 34.085  | 76.0004 | 3667 | 2     | 0.969       | 7400 ± 1200  | 257 ± 44  | 1432 ± 175            |
|                                    |                                    | S9                     | 32.4233 | 77.3067 | 3676 | 2     | 0.917       | 12700 ± 4600 | 468 ± 172 |                       |
|                                    |                                    | S10                    | 32.4233 | 77.3067 | 3678 | 2     | 0.913       | 19500 ± 1900 | 699 ± 80  |                       |

Notes: (1) mean the potential outlier defined by Peirce's criterion;

(2) mean the potential outlier removed according to original published.

**Table S2. Climate model simulations used to drive OGGM.**

| Name         | Institution                                                    | Resolution (lat × lon) | Reference                   | Time (CE) |
|--------------|----------------------------------------------------------------|------------------------|-----------------------------|-----------|
| CCSM4        | National Center for Atmospheric Research                       | 192 × 288              | Gent et al. (2011)          | 850-2006  |
| CESM1        | National Center for Atmospheric Research                       | 96 × 144               | Otto-Bliesner et al. (2016) | 850-2005  |
| GISS-E2-R    | NASA Goddard Institute for Space Studies                       | 90 × 144               | Schmidt et al. (2014)       | 850-2005  |
| IPSL-CM5A-LR | Institut Pierre-Simon- Laplace                                 | 96 × 96                | Dufresne et al. (2013)      | 850-2006  |
| MPI-ESM-P    | Max Planck Institute for Meteorology                           | 96 × 192               | Stevens et al. (2013)       | 850-2005  |
| BCC-CSM1-1   | Beijing Climate Center,<br>China Meteorological Administration | 64 × 128               | Wu et al. (2014)            | 850-2000  |
| CRU TS4.01   | Climatic Research Unit gridded Time Series                     | 360 × 720              | Harris et al. (2020)        | 1901-2018 |

**Table S3. Table shows the occurrence of each substage during LIA. Meanwhile, the maximum of the modelled glacier length, area, and volume changes during each substage are also shown in this table. Data is displayed for GISS, IPSL, MPI for all modelled glacier in BH.**

| Event       | LIA-4 |       |       | LIA-3 |       |       | LIA-2 |       |       | LIA-1 |       |       |
|-------------|-------|-------|-------|-------|-------|-------|-------|-------|-------|-------|-------|-------|
|             | GISS  | IPSL  | MPI   |
| Age (CE)    | 1400s | 1330s | 1270s | 1520s | 1520s | 1470s | 1710s | 1700s | 1700s | 1880s | 1900s | 1820s |
| ΔLength (%) | 72.9  | 97.6  | 117.7 | 61.4  | 73.3  | 76.6  | 37.9  | 79.0  | 61.7  | 55.6  | 56.4  | 70.9  |



|             |       |       |       |       |       |       |       |       |       |       |       |       |
|-------------|-------|-------|-------|-------|-------|-------|-------|-------|-------|-------|-------|-------|
| ΔArea (%)   | 175.0 | 221.9 | 106.8 | 154.9 | 163.2 | 100.8 | 127.8 | 178.4 | 96.0  | 141.5 | 128.9 | 109.6 |
| ΔVolume (%) | 465.7 | 589.7 | 467.0 | 416.8 | 412.5 | 568.4 | 354.7 | 435.7 | 567.5 | 395.5 | 342.2 | 648.8 |

## References

- Balco, G.: Contributions and unrealized potential contributions of cosmogenic-nuclide exposure dating to glacier chronology, 1990-2010, *Quaternary. Sci. Rev.*, *30*, 3-27, <https://doi.org/10.1016/j.quascirev.2010.11.003>, 2011.
- Balco, G., Stone, J.O., Lifton, N.A., and Dunai, T.J.: A complete and easily accessible means of calculating surface exposure ages or erosion rates from <sup>10</sup>Be and <sup>26</sup>Al measurements, *Quat. Geochronol.*, *3*, 174-195, <https://doi.org/10.1016/j.quageo.2007.12.001>, 2008.
- Barnard, P.L., Owen, L.A., & Finkel, R.C.: Style and timing of glacial and paraglacial sedimentation in a monsoon-influenced high Himalayan environment, the upper Bhagirathi Valley, Garhwal Himalaya, *Sediment. Geol.*, *165*, 199-221, <https://doi.org/10.1016/j.sedgeo.2003.11.009>, 2004a.
- Barnard, P.L., Owen, L.A., Finkel, R.C., and Asahi, K.: Landscape response to deglaciation in a high relief, monsoon-influenced alpine environment, Langtang Himal, Nepal, *Quaternary. Sci. Rev.*, *25*, 2162-2176, <https://doi.org/10.1016/j.quascirev.2006.02.002>, 2006.
- Barnard, P.L., Owen, L.A., Sharma, M.C., and Finkel, R.C.: Late Quaternary (Holocene) landscape evolution of a monsoon-influenced high Himalayan valley, Gori Ganga, Nanda Devi, NE Garhwal, *Geomorphology*, *61*, 91-110, <https://doi.org/10.1016/j.geomorph.2003.12.002>, 2004b.
- Chen, Y., Li, Y., Wang, Y., Zhang, M., Cui, Z., Yi, C., and Liu, G.: Late Quaternary glacial history of the Karlik Range, easternmost Tian Shan, derived from <sup>10</sup>Be surface exposure and optically stimulated luminescence datings, *Quaternary. Sci. Rev.*, *115*, 17-27, <http://dx.doi.org/10.1016/j.quascirev.2015.02.010>, 2015.
- Dortch, J.M., Owen, L.A., and Caffee, M.W.: Timing and climatic drivers for glaciation across semi-arid western Himalayan-Tibetan orogen, *Quaternary. Sci. Rev.*, *78*, 188-208, <http://dx.doi.org/10.1016/j.quascirev.2013.07.025>, 2013.
- Dufresne, J. L., Foujols, M., Denvil, S., Caubel, A., Marti, O., Aumont, O., Balkanski, Y., Bekki, S., Bellenger, H., Benshila, R., Bony, S., Bopp, L., Braconnot, P., Brockmann, P., Cadule, P., Cheruy, F., Codron, F., Cozic, A., Cugnet, D., de Noblet, N., Duvel, J. P., Ethé, C., Fairhead, L., Fichefet, T., Flavoni, S., Friedlingstein, P., Grandpeix, J. Y., Guez, L., Guilyardi, E., Hauglustaine, D., Hourdin, F., Idelkadi, A., Ghattas, J., Joussaume, S., Kageyama, M., Krinner, G., Labetoulle, S., Lahellec, A., Lefebvre, M. P., Lefevre, F., Levy, C.,

- Li, Z. X., Lloyd, J., Lott, F., Madec, G., Mancip, M., Marchand, M., Masson, S., Meurdesoif, Y., Mignot, J., Musat, I., Parouty, S., Polcher, J., Rio, C., Schulz, M., Swingedouw, D., Szopa, S., Talandier, C., Terray, P., Viovy, N., and Vuichard, N.: Climate change projections using the IPSL-CM5 Earth System Model: From CMIP3 to CMIP5, *Clim. Dyn.*, 40, 2123–2165, <https://doi.org/10.1007/s00382-012-1636-1>, 2013.
- Gent, P. R., Danabasoglu, G., Donner, L. J., Holland, M. M., Hunke, E. C., Jayne, S. R., Lawrence, D. M., Neale, R. B., Rasch, P. J., Vertenstein, M., Worley, P. H., Yang, Z.-L., and Zhang, M.: The Community Climate System Model Version 4, *J. Clim.*, 24, 4973–4991, <https://doi.org/10.1175/2011JCLI4083.1>, 2011.
- Harris, I., Jones, P., Osborn, T., and Lister, D.: Updated high-resolution grids of monthly climatic observations-the CRU TS3.10 Dataset, *International J. Climate.*, 34, 623–642, <https://doi.org/10.1002/joc.3711>, 2014.
- Heimsath, A.M., and McGlynn, R.: Quantifying periglacial erosion in the Nepal high Himalaya, *Geomorphology*, 97, 5-23, <https://doi.org/10.1016/j.geomorph.2007.02.046>, 2008.
- Heyman, J., Stroeven, A.P., Harbor, J.M., and Caffee, M.W.: Too young or too old: Evaluating cosmogenic exposure dating based on an analysis of compiled boulder exposure ages, *Earth. Planet. Sc. Lett.*, 302, 71-80, <https://doi.org/10.1016/j.epsl.2010.11.040>, 2011.
- Lee, S. Y., Seong, Y. B., Owen, L. A., Murari, M. K., Lim, H. S., Yoon, H. I. and Yoo, K.-C.: Late Quaternary glaciation in the Nun-Kun massif, northwestern India, *Boreas*, 43, 67–89, <https://doi.org/10.1111/bor.12022>, 2014.
- Li, Y., Li, Y., Harbor, J., Liu, G., Yi, C., and Caffee, M.W.: Cosmogenic  $^{10}\text{Be}$  constraints on Little Ice Age glacial advances in the eastern Tian Shan, China, *Quaternary. Sci. Rev.*, 138, 105-118, <http://dx.doi.org/10.1016/j.quascirev.2016.02.023>, 2016.
- Lifton, N., Sato, T., and Dunai, T.J.: Scaling in situ cosmogenic nuclide production rates using analytical approximations to atmospheric cosmic-ray fluxes, *Earth. Planet. Sc. Lett.*, 386, 149-160, <http://dx.doi.org/10.1016/j.epsl.2013.10.052>, 2014.
- Liu, J., Yi, C., Li, Y., Bi, W., Zhang, Q., and Hu, G.: Glacial fluctuations around the Karola Pass, eastern Lhagoi Kangri Range, since the Last Glacial Maximum, *J. Quaternary. Sci.*, 32(4), 516-527, <https://doi.org/10.1002/jqs.2946>, 2017.
- Murari, M.K., Owen, L.A., Dortch, J.M., Caffee, M.W., Dietsch, C., Fuchs, M., Haneberg, W.C., Sharma, M.C., and Townsend-Small, A.: Timing and climatic drivers for glaciation across monsoon-influenced regions of the Himalayan-Tibetan orogen, *Quaternary Science Review*, 88, 159-182, <http://dx.doi.org/10.1016/j.quascirev.2014.01.013>, 2014.

Otto-Bliesner, B. L., Brady, E. C., Fasullo, J., Jahn, A., Landrum, L., Stevenson, S., Rosenbloom, N., Mai, A., and Strand, G.: Climate variability and change since 850 C.E. An ensemble approach with the Community Earth System Model (CESM), *B. Am. Meteorol. Soc.*, *97*, 735–754, <https://doi.org/10.1175/BAMS-D-14-00233.1>, 2016.

Owen, L.A., and Dortch, J.M.: Nature and timing of Quaternary glaciation in the Himalayan-Tibetan orogen, *Quaternary. Sci. Rev.*, *88*, 14-54, <http://dx.doi.org/10.1016/j.quascirev.2013.11.016>, 2014.

Owen, L.A., Robinson, R., Benn, D.I., Finkel, R.C., Davis, N.K., Yi, C., Putkonen, J., Li, D., and Murray, A.S.: Quaternary glaciation of Mount Everest, *Quaternary. Sci. Rev.*, *28*, 1412-1433, <https://doi.org/10.1016/j.quascirev.2009.02.010>, 2009.

Owen, L.A., Yi, C., Finkel, R.C., and Davis, N.K.: Quaternary glaciation of Gurla Mandhata (Naimon'anyi). *Quaternary. Sci. Rev.*, *29*, 1817-1830, <https://doi.org/10.1016/j.quascirev.2010.03.017>, 2010.

Peirce, B.: Criterion for the rejection of doubtful observations, *Astron. J.*, *2*(45), 161-163, <https://doi.org/10.1086/100259>, 1852.

Peng, X., Chen Y., Liu, G., Liu, B., Li, Y., Liu, Q., Han, Y., Yang, W., and Cui, Z.: Late Quaternary glaciations in the Cogarbu valley, Bhutanese Himalaya, *J. Quaternary. Sci.*, *34*(1), 40-50, <http://dx.doi.org/10.1002/jqs.3079>, 2019.

Peng, X., Chen, Y., Li, Y., Liu, B., Liu, Q., Yang, W., Liu, G.: Late Holocene glacier fluctuations in the Bhutanese Himalaya, *Global. Planet. Change.*, *187*, 103137, <https://doi.org/10.1016/j.gloplacha.2020.103137>, 2020.

Ross, S.M.: Peirce's criterion for the elimination of suspect experimental data, *J. Eng. Technol-Us.*, *20*, 38-41, 2003.

Saha, S., Owen, L.A., Orr, E.N., and Caffee, M.W.: Timing and nature of Holocene glacier advances at the northwestern end of the Himalayan-Tibetan orogen, *Quaternary. Sci. Rev.*, *187*, 177-202, <https://doi.org/10.1016/j.quascirev.2018.03.009>, 2018.

Saha, S., Owen, L.A., Orr, E.N., and Caffee, M.W.: High-frequency Holocene glacier fluctuations in the Himalayan-Tibetan orogen, *Quaternary. Sci. Rev.*, *220*, 372-400, <https://doi.org/10.1016/j.quascirev.2019.07.021>, 2019.

Scherler, D., Bookhagen, B., Strecker, M.R., Blanckenburg, F., and Rood, D.: Timing and extent of late Quaternary glaciation in the western Himalaya constrained by <sup>10</sup>Be moraine dating in Garhwal, India, *Quaternary. Sci. Rev.*, *29*, 815-831, <https://doi.org/10.1016/j.quascirev.2009.11.031>, 2010.

Schmidt, G. A., Kelley, M., Nazarenko, L., Ruedy, R., Russell, G. L., Aleinov, I., Bauer, M., Bauer, S. E., Bhat, M. K., Bleck, R., Canuto, V., Chen, Y., Cheng, Y., Clune, T. L., Genio, A. D., Fainchtein, R. D., Faluvegi, G., Hansen, J. E., Healy, R. J., Kiang, N. Y., Koch, D., Lacis, A., Legrande, A. N., Lerner, J., Lo, K. K., Matthews, E. E., Menon, S., Miller, R. L., Oinas, V., Oloso, A. O., Perlwitz, J. P., Puma, M. J., Putman, W. M., Rund, D., Romanou, A., Sato, M., Shindell, D. T., Sun, S., Syed, R. A., Tausnev, N., Tsigaridis, K., Unger, N., Voulgarakis, A., Yao, M.-S., and Zhang, J.: Configuration and assessment of the GISS ModelE2 contributions to the CMIP5 archive, *J. Advan. in Mode. Earth Syst.*, 6, 141–184, <https://doi.org/10.1002/2013MS000265>, 2014.

Stevens, B., Giorgetta, M., Esch, M., Mauritsen, T., Crueger, T., Rast, S., Salzmann, M., Schmidt, H., Bader, J., Block, K., Brokopf, R., Fast, I., Kinne, S., Kornblueh, L., Lohmann, U., Pincus, R., Reichler, T., and Roeckner, E.: The atmospheric component of the MPI-M earth system model: ECHAM6, *J. Adv. Model. Earth Syst.*, 5, 1–27, <https://doi.org/10.1002/jame.20015>, 2013.

Wu, T., Song, L., Li, W., Wang, Z., Zhang, H., Xin, X., Zhang, Y., Zhang, L., Li, J., Wu, F., Liu, Y., Zhang, F., Shi, X., Chu, M., Zhang, J., Fang, Y., Wang, F., Lu, Y., Liu, X., Wei, M., Liu, Q., Zhou, W., Dong, M., Zhao, Q., Ji, J., Li, L., and Zhou, M.: An overview of BCC climate system model development and application for climate change studies, *J. Met. Res.*, 28, 34–56, <https://doi.org/10.1007/s13351-014-3041-7>, 2014.

Yang, W., Han, Y., Peng, X., Ran, Z., Liu, Q., and Liu, G.: Paleoglacial and paleoclimate reconstructions during the global Last Glacial Maximum in the Longriba area, eastern Tibetan Plateau, *Journal of Mountain Science*, 18(2), 307-322, <https://doi.org/10.1007/s11629-020-6238-5>, 2021.

Zech, R., Zech, M., Kubik, P.W., Kharki, K., and Zech, W.: Deglaciation and landscape history around Annapurna, Nepal, based on <sup>10</sup>Be surface exposure dating, *Quaternary. Sci. Rev.*, 28, 1106-1118, <http://doi.org/10.1016/j.quascirev.2008.11.013>, 2009.

Zhang, Q., Yi, C., Dong, G., Fu, P., Wang, N., and Capolongo, D.: Quaternary glaciations in the Lopu Kangri area, central Gangdise Mountains, southern Tibetan Plateau, *Quaternary. Sci. Rev.*, 201, 470-482, <https://doi.org/10.1016/j.quascirev.2018.10.027>, 2018.
